# Supplementary material for: Selective inhibition of TGF-β1 produced by GARP-expressing Tregs overcomes resistance to PD-1/PD-L1 blockade in cancer
Source: PubMed Central journal article supplement (PMC7486376; doi:10.1038/s41467-020-17811-3), 2020-09-11
Supplement: 41467_2020_17811_MOESM3_ESM.pdf [file 41467_2020_17811_MOESM3_ESM.pdf]

## **Description of Additional Supplementary Files**

File Name: Supplementary Data 1

Description: Ordered transcript lists used for GSEA analyses in figure 8.

File Name: Supplementary Data 2

Description: Experimental gene sets used for GSEA analyses in figure 8.
